# Supplementary material for: Endometrial scratch vs no intervention in egg donation cycles: the ENDOSCRATCH trial protocol
Source: Springer Nature journal article supplement (doi:10.1186/s12884-020-02958-0), 2020-05-30

## Additional File 1. The ENDOSCRATCH Trial Protocol (NCT03108157) Participant timeline

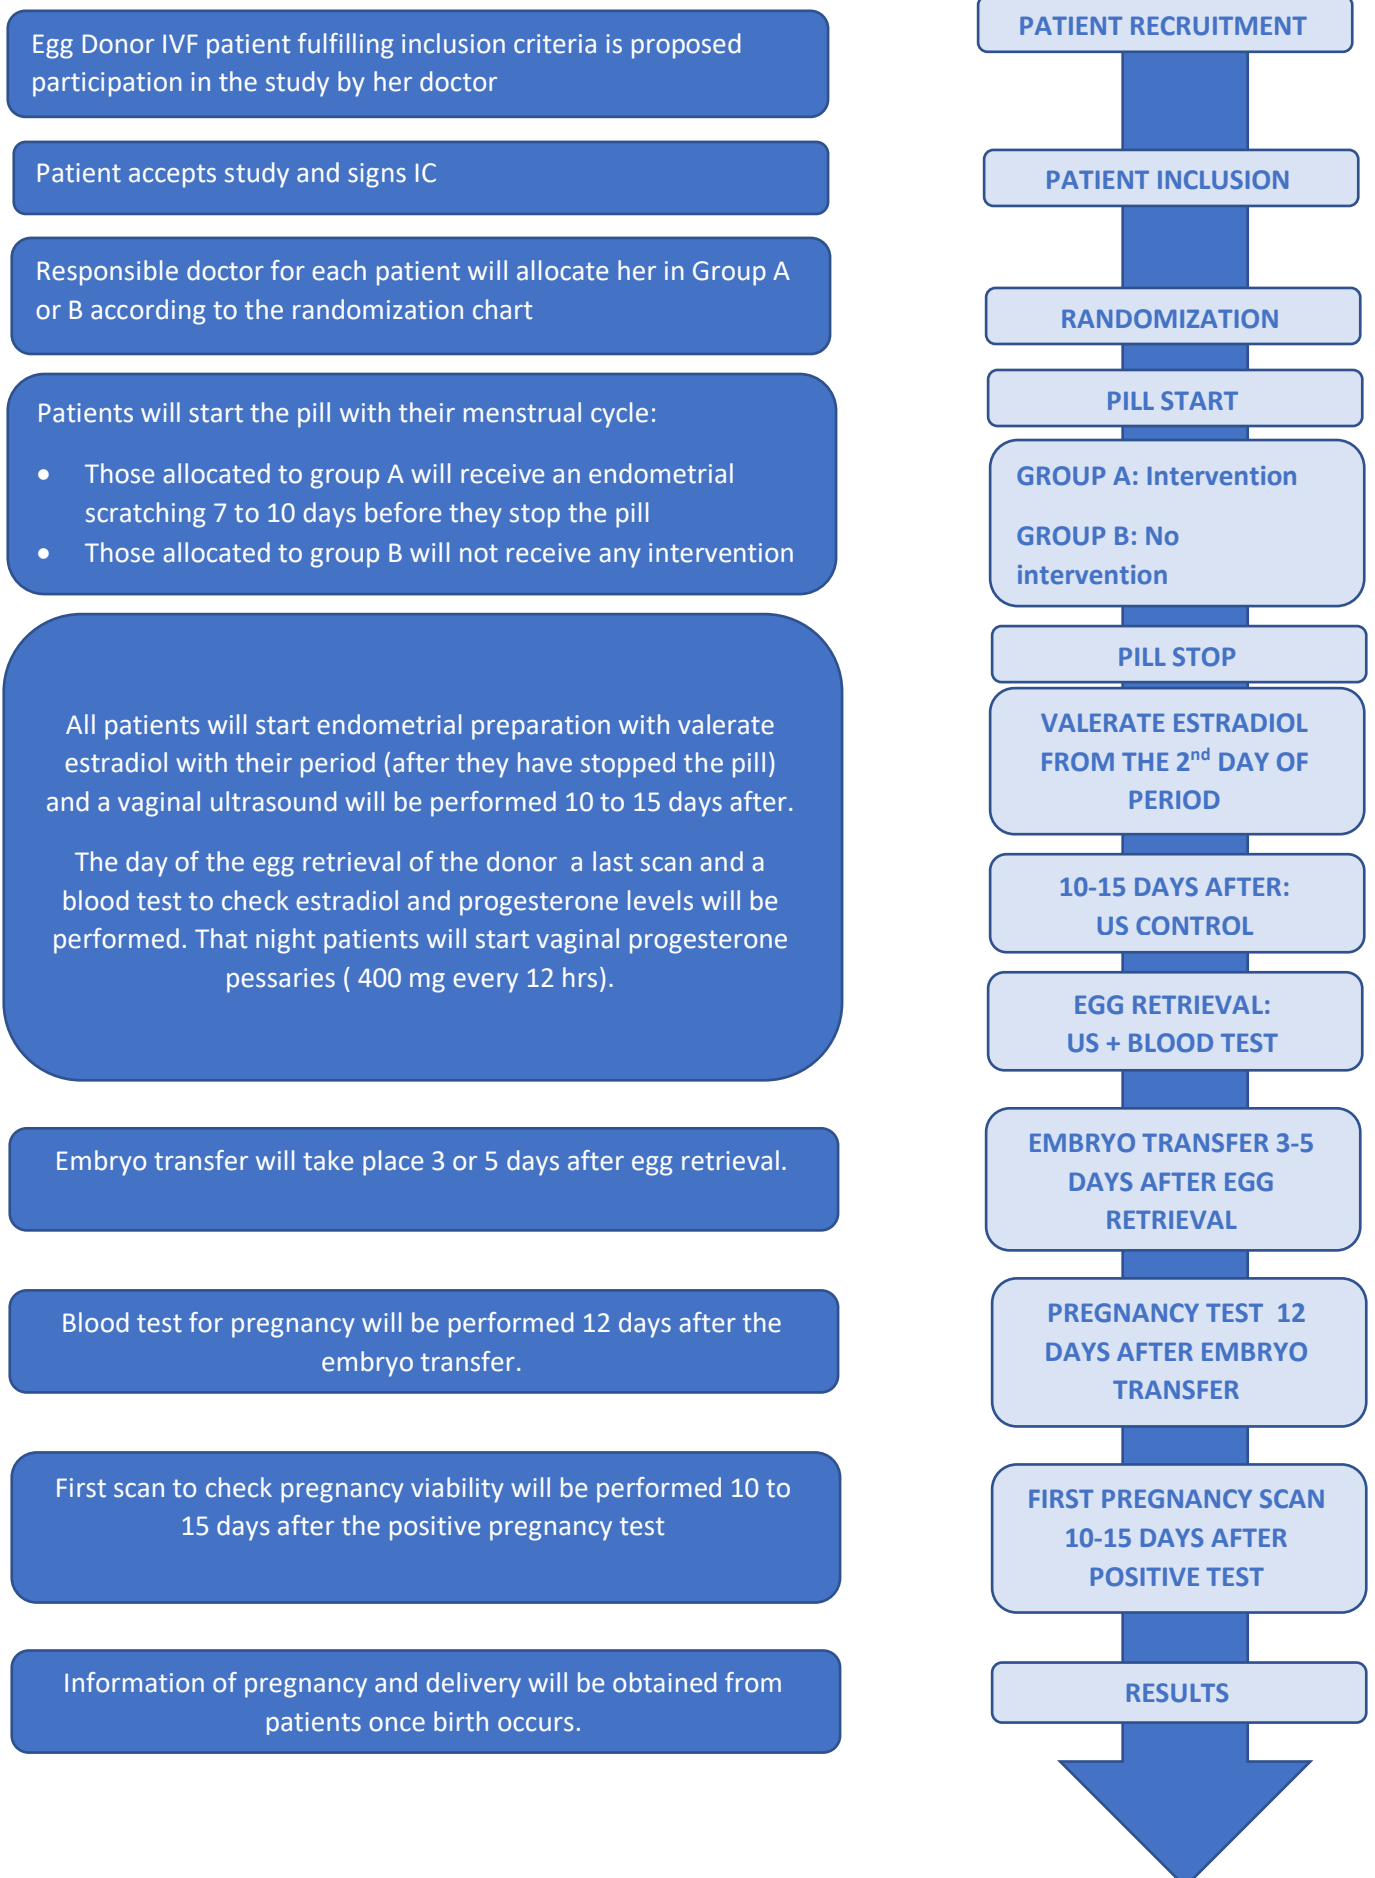

Supplement: MOESM1 [file 18034994]
